# Supplementary material for: Rapid and complicated HIV genotype expansion among high-risk groups in Guangdong Province, China
Source: PubMed Central journal article supplement (PMC6387515; doi:10.1186/s12879-019-3788-7), 2019-02-22
Supplement: 12879_2019_3788_MOESM1_ESM.pdf [file 12879_2019_3788_MOESM1_ESM.pdf]

Table S1. Representative evaluation of genotyped samples by city in the study.

| Region          | City             | Risk Group       | Reported cases | Genotyped samples | Chi-square | P value |       |
|-----------------|------------------|------------------|----------------|-------------------|------------|---------|-------|
| PRD             | <b>Guangzhou</b> | IDU              | 110            | 4                 | 1.673      | 0.643   |       |
|                 |                  | Sex+IDU          | 7              | 1                 |            |         |       |
|                 |                  | Heterosexual     | 715            | 43                |            |         |       |
|                 |                  | MSM              | 498            | 29                |            |         |       |
|                 | <b>Shenzhen</b>  | IDU              | 88             | 5                 | 4.569      | 0.206   |       |
|                 |                  | Sex+IDU          | 19             | 2                 |            |         |       |
|                 |                  | Heterosexual     | 533            | 21                |            |         |       |
|                 |                  | MSM              | 547            | 37                |            |         |       |
|                 | <b>Dongguan</b>  | IDU              | 40             | 6                 | 1.303      | 0.728   |       |
|                 |                  | Sex+IDU          | 3              | 1                 |            |         |       |
|                 |                  | Heterosexual     | 392            | 44                |            |         |       |
|                 |                  | MSM              | 140            | 16                |            |         |       |
|                 | <b>Foshan</b>    | IDU              | 102            | 14                | 1.002      | 0.606   |       |
|                 |                  | Heterosexual     | 291            | 39                |            |         |       |
|                 |                  | MSM              | 88             | 8                 |            |         |       |
|                 | <b>Jiangmen</b>  | IDU              | 72             | 15                | 0.172      | 0.982   |       |
|                 |                  | Sex+IDU          | 3              | 1                 |            |         |       |
|                 |                  | Heterosexual     | 196            | 40                |            |         |       |
|                 |                  | MSM              | 20             | 4                 |            |         |       |
|                 | <b>Zhongshan</b> | IDU              | 18             | 7                 | 1.496      | 0.683   |       |
|                 |                  | Heterosexual     | 123            | 41                |            |         |       |
|                 |                  | MSM              | 44             | 11                |            |         |       |
|                 |                  | MCT              | 1              | 1                 |            |         |       |
|                 | <b>Huizhou</b>   | IDU              | 23             | 10                | 0.192      | 0.979   |       |
|                 |                  | Heterosexual     | 111            | 41                |            |         |       |
|                 |                  | Sex+IDU          | 3              | 1                 |            |         |       |
|                 |                  | MSM              | 17             | 7                 |            |         |       |
|                 | <b>Zhaoqing</b>  | IDU              | 12             | 9                 | 1.826      | 0.609   |       |
|                 |                  | Heterosexual     | 92             | 39                |            |         |       |
|                 |                  | MSM              | 3              | 1                 |            |         |       |
|                 |                  | MCT              | 1              | 1                 |            |         |       |
|                 | <b>Zhuhai</b>    | IDU              | 5              | 2                 | 0.550      | 0.760   |       |
|                 |                  | Heterosexual     | 37             | 20                |            |         |       |
|                 |                  | MSM              | 39             | 26                |            |         |       |
|                 | Western          | <b>Yangjiang</b> | IDU            | 57                | 19         | 2.421   | 0.298 |
|                 |                  |                  | Heterosexual   | 123               | 36         |         |       |
|                 |                  |                  | MCT            | 3                 | 3          |         |       |
|                 |                  | <b>Zhanjiang</b> | IDU            | 12                | 3          | 3.683   | 0.298 |
|                 |                  |                  | Heterosexual   | 140               | 40         |         |       |
|                 |                  |                  | MSM            | 19                | 9          |         |       |
|                 |                  |                  | MCT            | 3                 | 3          |         |       |
|                 |                  | <b>Yunfu</b>     | IDU            | 7                 | 1          | 0.559   | 0.756 |
| Heterosexual    |                  |                  | 137            | 43                |            |         |       |
| MSM             |                  |                  | 3              | 1                 |            |         |       |
| <b>Maoming</b>  |                  | Heterosexual     | 130            | 54                | 0.025      | 0.988   |       |
|                 |                  | MSM              | 5              | 2                 |            |         |       |
|                 |                  | MCT              | 2              | 1                 |            |         |       |
| Northern        |                  | <b>Qingyuan</b>  | IDU            | 5                 | 4          | 1.971   | 0.373 |
|                 |                  |                  | Heterosexual   | 136               | 53         |         |       |
|                 | MSM              |                  | 2              | 2                 |            |         |       |
|                 | <b>Shaoguan</b>  | IDU              | 6              | 3                 | 0.526      | 0.769   |       |
|                 |                  | Heterosexual     | 45             | 25                |            |         |       |
|                 |                  | MSM              | 9              | 3                 |            |         |       |
|                 | <b>Heyuan</b>    | IDU              | 9              | 5                 | 0.844      | 0.839   |       |
|                 |                  | Heterosexual     | 34             | 25                |            |         |       |
|                 |                  | MSM              | 2              | 2                 |            |         |       |
|                 |                  | NA               | 3              | 1                 |            |         |       |
|                 | <b>Meizhou</b>   | Heterosexual     | 42             | 27                | 0.141      | 0.932   |       |
|                 |                  | MSM              | 1              | 1                 |            |         |       |
|                 |                  | MCT              | 2              | 1                 |            |         |       |
|                 | Eastern          | <b>Shantou</b>   | Heterosexual   | 74                | 40         | 0.136   | 0.712 |
|                 |                  |                  | MSM            | 14                | 9          |         |       |
| <b>Jieyang</b>  |                  | Heterosexual     | 35             | 18                | 0.074      | 0.786   |       |
|                 |                  | MSM              | 3              | 2                 |            |         |       |
| <b>Shanwei</b>  |                  | IDU              | 3              | 3                 | 2.475      | 0.480   |       |
|                 |                  | Heterosexual     | 12             | 11                |            |         |       |
|                 |                  | MSM              | 1              | 1                 |            |         |       |
|                 |                  | NA               | 9              | 3                 |            |         |       |
| <b>Chaozhou</b> |                  | Heterosexual     | 17             | 16                | 0.006      | 0.939   |       |
|                 |                  | MSM              | 4              | 4                 |            |         |       |
