# Supplementary material for: Rapid and complicated HIV genotype expansion among high-risk groups in Guangdong Province, China
Source: PubMed Central journal article supplement (PMC6387515; doi:10.1186/s12879-019-3788-7), 2019-02-22
Supplement: 12879_2019_3788_MOESM2_ESM.pdf [file 12879_2019_3788_MOESM2_ESM.pdf]

|                 |                  |             |             |            |            |            |            |             |           |           |           |           |           |            |            |           |           |           |          |
|-----------------|------------------|-------------|-------------|------------|------------|------------|------------|-------------|-----------|-----------|-----------|-----------|-----------|------------|------------|-----------|-----------|-----------|----------|
|                 | <b>Zhanjiang</b> | <b>135</b>  | <b>16</b>   | <b>21</b>  | <b>2</b>   | <b>0</b>   | <b>0</b>   | <b>174</b>  | <b>0</b>  | <b>0</b>  | <b>0</b>  | <b>0</b>  | <b>0</b>  | <b>0</b>   | <b>0</b>   | <b>0</b>  | <b>0</b>  | <b>0</b>  | <b>0</b> |
|                 | IDU              | 12          | 0           | 0          | 0          | 0          | 0          | 12          | 0         | 0         | 0         | 0         | 0         | 0          | 0          | 0         | 0         | 0         | 0        |
|                 | Heteosexual      | 105         | 14          | 21         | 0          | 0          | 0          | 140         | 0         | 0         | 0         | 0         | 0         | 0          | 0          | 0         | 0         | 0         | 0        |
|                 | MSM              | 15          | 2           | 0          | 2          | 0          | 0          | 19          | 0         | 0         | 0         | 0         | 0         | 0          | 0          | 0         | 0         | 0         | 0        |
|                 | MCT              | 3           | 0           | 0          | 0          | 0          | 0          | 3           | 0         | 0         | 0         | 0         | 0         | 0          | 0          | 0         | 0         | 0         | 0        |
|                 | <b>Yunfu</b>     | <b>119</b>  | <b>19</b>   | <b>0</b>   | <b>0</b>   | <b>0</b>   | <b>9</b>   | <b>147</b>  | <b>0</b>  | <b>0</b>  | <b>0</b>  | <b>0</b>  | <b>0</b>  | <b>6</b>   | <b>0</b>   | <b>0</b>  | <b>0</b>  | <b>3</b>  | <b>0</b> |
|                 | IDU              | 7           | 0           | 0          | 0          | 0          | 0          | 7           | 0         | 0         | 0         | 0         | 0         | 0          | 0          | 0         | 0         | 0         | 0        |
|                 | Heteosexual      | 112         | 16          | 0          | 0          | 0          | 9          | 137         | 0         | 0         | 0         | 0         | 0         | 6          | 0          | 0         | 0         | 3         | 0        |
|                 | MSM              | 0           | 3           | 0          | 0          | 0          | 0          | 3           | 0         | 0         | 0         | 0         | 0         | 0          | 0          | 0         | 0         | 0         | 0        |
|                 | <b>Maoming</b>   | <b>94</b>   | <b>14</b>   | <b>24</b>  | <b>2</b>   | <b>2</b>   | <b>0</b>   | <b>136</b>  | <b>0</b>  | <b>0</b>  | <b>2</b>  | <b>0</b>  | <b>0</b>  | <b>0</b>   | <b>0</b>   | <b>0</b>  | <b>0</b>  | <b>0</b>  | <b>0</b> |
|                 | Heteosexual      | 89          | 14          | 22         | 2          | 2          | 0          | 129         | 0         | 0         | 2         | 0         | 0         | 0          | 0          | 0         | 0         | 0         | 0        |
|                 | MSM              | 5           | 0           | 0          | 0          | 0          | 0          | 5           | 0         | 0         | 0         | 0         | 0         | 0          | 0          | 0         | 0         | 0         | 0        |
|                 | MCT              | 0           | 0           | 2          | 0          | 0          | 0          | 2           | 0         | 0         | 0         | 0         | 0         | 0          | 0          | 0         | 0         | 0         | 0        |
| <b>Northern</b> | <b>Qingyuan</b>  | <b>87</b>   | <b>47</b>   | <b>5</b>   | <b>4</b>   | <b>0</b>   | <b>0</b>   | <b>143</b>  | <b>0</b>  | <b>0</b>  | <b>0</b>  | <b>0</b>  | <b>0</b>  | <b>0</b>   | <b>0</b>   | <b>0</b>  | <b>0</b>  | <b>0</b>  | <b>0</b> |
|                 | IDU              | 0           | 5           | 0          | 0          | 0          | 0          | 5           | 0         | 0         | 0         | 0         | 0         | 0          | 0          | 0         | 0         | 0         | 0        |
|                 | Heteosexual      | 87          | 41          | 5          | 3          | 0          | 0          | 136         | 0         | 0         | 0         | 0         | 0         | 0          | 0          | 0         | 0         | 0         | 0        |
|                 | MSM              | 0           | 1           | 0          | 1          | 0          | 0          | 2           | 0         | 0         | 0         | 0         | 0         | 0          | 0          | 0         | 0         | 0         | 0        |
|                 | <b>Shaoguan</b>  | <b>25</b>   | <b>26</b>   | <b>2</b>   | <b>2</b>   | <b>2</b>   | <b>4</b>   | <b>61</b>   | <b>0</b>  | <b>2</b>  | <b>0</b>  | <b>0</b>  | <b>0</b>  | <b>0</b>   | <b>4</b>   | <b>0</b>  | <b>0</b>  | <b>0</b>  | <b>0</b> |
|                 | IDU              | 0           | 6           | 0          | 0          | 0          | 0          | 6           | 0         | 0         | 0         | 0         | 0         | 0          | 0          | 0         | 0         | 0         | 0        |
|                 | Heteosexual      | 22          | 14          | 2          | 2          | 2          | 4          | 46          | 0         | 2         | 0         | 0         | 0         | 0          | 4          | 0         | 0         | 0         | 0        |
|                 | MSM              | 3           | 6           | 0          | 0          | 0          | 0          | 9           | 0         | 0         | 0         | 0         | 0         | 0          | 0          | 0         | 0         | 0         | 0        |
|                 | <b>Heyuan</b>    | <b>28</b>   | <b>15</b>   | <b>4</b>   | <b>0</b>   | <b>0</b>   | <b>1</b>   | <b>48</b>   | <b>0</b>  | <b>0</b>  | <b>0</b>  | <b>0</b>  | <b>0</b>  | <b>1</b>   | <b>0</b>   | <b>0</b>  | <b>0</b>  | <b>0</b>  | <b>0</b> |
|                 | IDU              | 7           | 2           | 0          | 0          | 0          | 0          | 9           | 0         | 0         | 0         | 0         | 0         | 0          | 0          | 0         | 0         | 0         | 0        |
|                 | Heteosexual      | 18          | 11          | 4          | 0          | 0          | 1          | 34          | 0         | 0         | 0         | 0         | 0         | 1          | 0          | 0         | 0         | 0         | 0        |
|                 | MSM              | 0           | 2           | 0          | 0          | 0          | 0          | 2           | 0         | 0         | 0         | 0         | 0         | 0          | 0          | 0         | 0         | 0         | 0        |
|                 | NA               | 3           | 0           | 0          | 0          | 0          | 0          | 3           | 0         | 0         | 0         | 0         | 0         | 0          | 0          | 0         | 0         | 0         | 0        |
|                 | <b>Meizhou</b>   | <b>33</b>   | <b>8</b>    | <b>2</b>   | <b>0</b>   | <b>0</b>   | <b>3</b>   | <b>46</b>   | <b>0</b>  | <b>0</b>  | <b>0</b>  | <b>0</b>  | <b>0</b>  | <b>0</b>   | <b>0</b>   | <b>0</b>  | <b>0</b>  | <b>3</b>  | <b>0</b> |
|                 | Heteosexual      | 30          | 8           | 2          | 0          | 0          | 3          | 43          | 0         | 0         | 0         | 0         | 0         | 0          | 0          | 0         | 0         | 3         | 0        |
|                 | MSM              | 1           | 0           | 0          | 0          | 0          | 0          | 1           | 0         | 0         | 0         | 0         | 0         | 0          | 0          | 0         | 0         | 0         | 0        |
|                 | MCT              | 2           | 0           | 0          | 0          | 0          | 0          | 2           | 0         | 0         | 0         | 0         | 0         | 0          | 0          | 0         | 0         | 0         | 0        |
| <b>Eastern</b>  | <b>Shantou</b>   | <b>47</b>   | <b>12</b>   | <b>2</b>   | <b>7</b>   | <b>16</b>  | <b>4</b>   | <b>88</b>   | <b>10</b> | <b>2</b>  | <b>0</b>  | <b>4</b>  | <b>0</b>  | <b>0</b>   | <b>2</b>   | <b>0</b>  | <b>0</b>  | <b>0</b>  | <b>2</b> |
|                 | Heteosexual      | 44          | 7           | 2          | 7          | 10         | 4          | 74          | 4         | 2         | 0         | 4         | 0         | 0          | 2          | 0         | 0         | 0         | 2        |
|                 | MSM              | 3           | 5           | 0          | 0          | 6          | 0          | 14          | 6         | 0         | 0         | 0         | 0         | 0          | 0          | 0         | 0         | 0         | 0        |
|                 | <b>Jieyang</b>   | <b>21</b>   | <b>8</b>    | <b>2</b>   | <b>0</b>   | <b>8</b>   | <b>0</b>   | <b>39</b>   | <b>4</b>  | <b>4</b>  | <b>0</b>  | <b>0</b>  | <b>0</b>  | <b>0</b>   | <b>0</b>   | <b>0</b>  | <b>0</b>  | <b>0</b>  | <b>0</b> |
|                 | Heteosexual      | 19          | 6           | 2          | 0          | 8          | 0          | 35          | 4         | 4         | 0         | 0         | 0         | 0          | 0          | 0         | 0         | 0         | 0        |
|                 | MSM              | 2           | 2           | 0          | 0          | 0          | 0          | 4           | 0         | 0         | 0         | 0         | 0         | 0          | 0          | 0         | 0         | 0         | 0        |
|                 | <b>Shanwei</b>   | <b>19</b>   | <b>1</b>    | <b>1</b>   | <b>0</b>   | <b>2</b>   | <b>0</b>   | <b>23</b>   | <b>0</b>  | <b>2</b>  | <b>0</b>  | <b>0</b>  | <b>0</b>  | <b>0</b>   | <b>0</b>   | <b>0</b>  | <b>0</b>  | <b>0</b>  | <b>0</b> |
|                 | IDU              | 3           | 0           | 0          | 0          | 0          | 0          | 3           | 0         | 0         | 0         | 0         | 0         | 0          | 0          | 0         | 0         | 0         | 0        |
|                 | Heteosexual      | 7           | 0           | 1          | 0          | 2          | 0          | 10          | 0         | 2         | 0         | 0         | 0         | 0          | 0          | 0         | 0         | 0         | 0        |
|                 | MSM              | 0           | 1           | 0          | 0          | 0          | 0          | 1           | 0         | 0         | 0         | 0         | 0         | 0          | 0          | 0         | 0         | 0         | 0        |
|                 | NA               | 9           | 0           | 0          | 0          | 0          | 0          | 9           | 0         | 0         | 0         | 0         | 0         | 0          | 0          | 0         | 0         | 0         | 0        |
|                 | <b>Chaozhou</b>  | <b>8</b>    | <b>6</b>    | <b>0</b>   | <b>1</b>   | <b>3</b>   | <b>2</b>   | <b>20</b>   | <b>1</b>  | <b>1</b>  | <b>0</b>  | <b>1</b>  | <b>0</b>  | <b>1</b>   | <b>0</b>   | <b>0</b>  | <b>0</b>  | <b>1</b>  | <b>0</b> |
|                 | Heteosexual      | 6           | 5           | 0          | 1          | 3          | 1          | 16          | 1         | 1         | 0         | 1         | 0         | 1          | 0          | 0         | 0         | 0         | 0        |
|                 | MSM              | 2           | 1           | 0          | 0          | 0          | 1          | 4           | 0         | 0         | 0         | 0         | 0         | 0          | 0          | 0         | 0         | 1         | 0        |
|                 | <b>Total</b>     | <b>2385</b> | <b>1452</b> | <b>461</b> | <b>471</b> | <b>262</b> | <b>485</b> | <b>5516</b> | <b>63</b> | <b>40</b> | <b>93</b> | <b>49</b> | <b>17</b> | <b>228</b> | <b>171</b> | <b>32</b> | <b>28</b> | <b>24</b> | <b>2</b> |

\* Other includes subtype B, B', CRF59\_01B, C and G; DG represents discordant genotypes including CRF01/C, CRF07/CRF01, B/CRF01, CRF01/B, 0107/CRF01, and BC/C.
